# Supplementary material for: In situ rapid synthesis of ionic liquid/ionic covalent organic framework composites for CO2 fixation
Source: Royal Society of Chemistry journal article supplement (doi:10.1039/d3cc04763f), 2023-01-01
Supplement: d3cc04763f1.pdf [file d3cc04763f1.pdf]

**Supplementary Information for**

**In situ rapid synthesis of ionic liquid/ionic covalent organic  
framework composites for CO<sub>2</sub> fixation**

Zhifeng Xu<sup>†a</sup>, Wenting Wang<sup>†a</sup>, Bowei Chen<sup>a</sup>, Haitao Zhou<sup>a</sup>, Qiufang Yao<sup>b</sup>, Xianjie Shen<sup>a</sup>, Yuchen Pan<sup>a</sup>, Dongxian Wu<sup>a</sup>, Yongyong Cao<sup>a</sup>, Zhangfeng Shen<sup>a</sup>, Yanan Liu<sup>a</sup>, Qineng Xia<sup>a</sup>, Xi Li<sup>a</sup>, Xiaoqin Zou<sup>\*c</sup>, Yangang Wang<sup>\*a</sup> and Lingchang Jiang<sup>\*a</sup>

<sup>a</sup> College of Biological, Chemical Science and Engineering, Jiaying University, Jiaying, Zhejiang 314001, China. E-mail: [jianglingchang@zjxu.edu.cn](mailto:jianglingchang@zjxu.edu.cn)

<sup>b</sup> College of Advanced Materials Engineering, Jiaying Nanhu University, 572 Yuexiu Road, Jiaying 314001, China

<sup>c</sup> Faculty of Chemistry, Northeast Normal University, No.5268, Renmin Street, Nanguan District, Changchun, Jilin 130024, China. E-mail: [zouxq100@nenu.edu.cn](mailto:zouxq100@nenu.edu.cn)

<sup>†</sup> These authors contributed equally.

Email: [jianglingchang@zjxu.edu.cn](mailto:jianglingchang@zjxu.edu.cn); [zouxq100@nenu.edu.cn](mailto:zouxq100@nenu.edu.cn)

## Experimental section

### Reagents and Materials.

1,3,5-Triphenylbenzene (TP), dichloromethane ( $\text{CH}_2\text{Cl}_2$ ), Ethidium Bromide (EB), 1-Butyl-3-Methylimidazolium Tetrafluoroborate, 1-Hexyl-3-Methylimidazolium Tetrafluoroborate, 1-Decyl-3-Methylimidazolium Tetrafluoroborate, tetrahydrofuran (THF) and methanol were purchased from Titan Technology (Shanghai) in 99.5% purity and ethanol was obtained from Sinopharm Chemical Reagent in 95% purity. All the reagents and reactants are used as received without any purification.

### Synthesis of catalytic composites

**Preparation of  $\text{C}_4\text{-IL/ICOF}$ :** TP (10.5 mg, 0.01 mmol), EB (29.6 mg, 0.075 mmol) and 1-Butyl-3-Methylimidazolium (0.2 ml) were added into a 5 mL centrifuge tube. Then the mixture was rapidly stirred for 0.5 h under ambient conditions. The resulting product was firstly washed with adequate methanol, and ethanol, THF and  $\text{CH}_2\text{Cl}_2$  were further used to purify the product by Soxhlet extraction. The final material was obtained as a red powder after drying under vacuum for 12 h at  $80^\circ\text{C}$ .

**Preparation of  $\text{C}_6\text{-IL/ICOF}$ :** The synthesis process of  $\text{C}_6\text{-IL/ICOF}$  was similar to that of  $\text{C}_4\text{-IL/ICOF}$  except that 1-Hexyl-3-Methylimidazolium Tetrafluoroborate was used instead of 1-Butyl-3-Methylimidazolium.

**Preparation of  $\text{C}_{10}\text{-IL/ICOF}$ :** The synthesis process of  $\text{C}_{10}\text{-IL/ICOF}$  was similar to that of  $\text{C}_4\text{-IL/ICOF}$  except that 1-Decyl-3-Methylimidazolium Tetrafluoroborate was used instead of 1-Butyl-3-Methylimidazolium.

**Preparation of amorphous POP:** TP (10.5 mg, 0.01 mmol), EB (29.6 mg, 0.075 mmol) and DMF (20 ml) were added into a 50 mL a round bottomed flask. Then the mixture was rapidly stirred and heated at  $120^\circ\text{C}$  for 24 h. The resulting product was firstly washed with adequate methanol, and ethanol, THF and  $\text{CH}_2\text{Cl}_2$  were further used to purify the product by Soxhlet extraction. The final material was obtained as a red powder after drying under vacuum for 12 h at  $80^\circ\text{C}$ .

## Catalytic test

The cycloaddition reaction of CO<sub>2</sub> to epoxides into cyclic carbonate was carried at a 25 mL high-pressure stainless-steel reactor. 25 mg of IL/ICOF and epoxide (35 mmol) were charged into a reactor, which was pressurized with 0.5 MPa CO<sub>2</sub> for 3 times to purge the air. Then the reactor was stirred and reacted under different conditions (CO<sub>2</sub> pressure, temperature, time). After reaction, the reactor was cooled to room temperature and then the extra CO<sub>2</sub> was released slowly into the water. The catalyst and the product were separated by centrifugation. The yields were analyzed by a gas chromatograph (Agilent 7890B). The internal standard substance of n-dodecane was selected to quantitatively analyze the composition of the cycloaddition products. The stability of the catalyst was tested by a five-run test and the catalyst was washed by ethanol and deionized water to recycle for the next run.

## Characterization

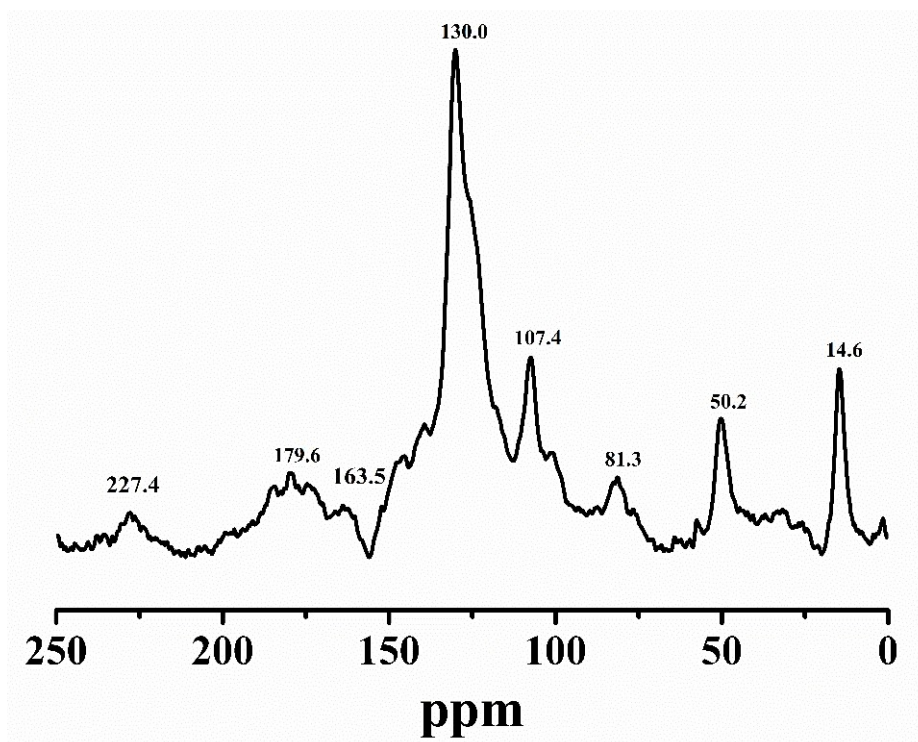

Fig. 1  $^{13}\text{C}$  CP/MAS NMR spectrum of  $\text{C}_4\text{-IL/ICOF}$ .

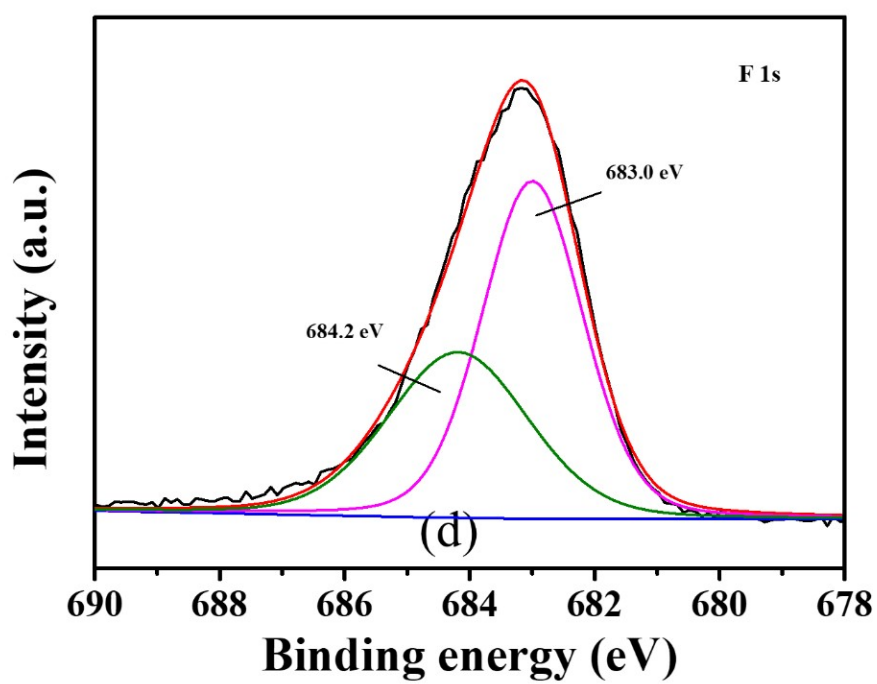

Fig. 2 F 1s XPS spectrum of  $\text{C}_4\text{-IL/ICOF}$ .

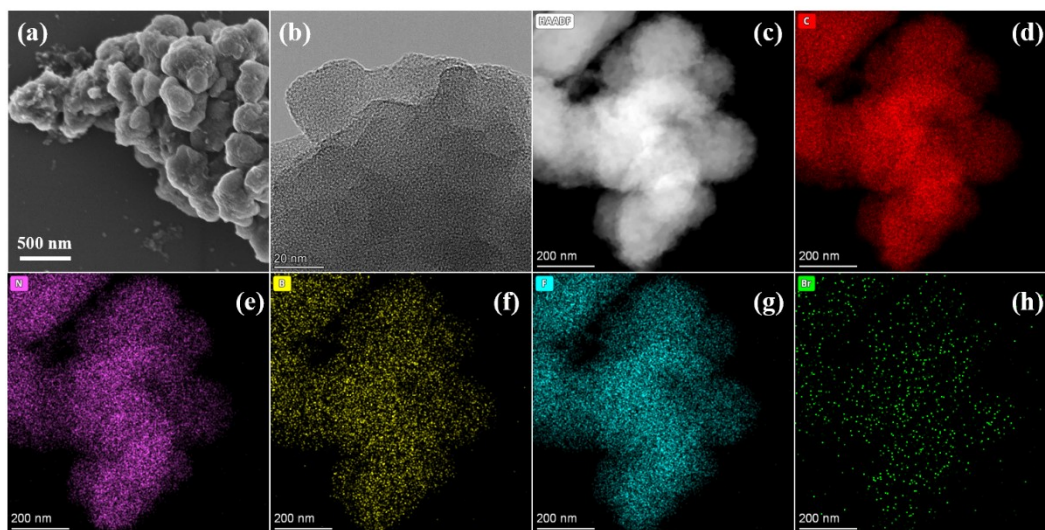

**Fig. 3** (a) SEM image of C<sub>4</sub>-IL/ICOF; (b) TEM image of C<sub>4</sub>-IL/ICOF; (c-h) the EDS mapping images of C, N, O, B, F and Br of C<sub>4</sub>-IL/ICOF.

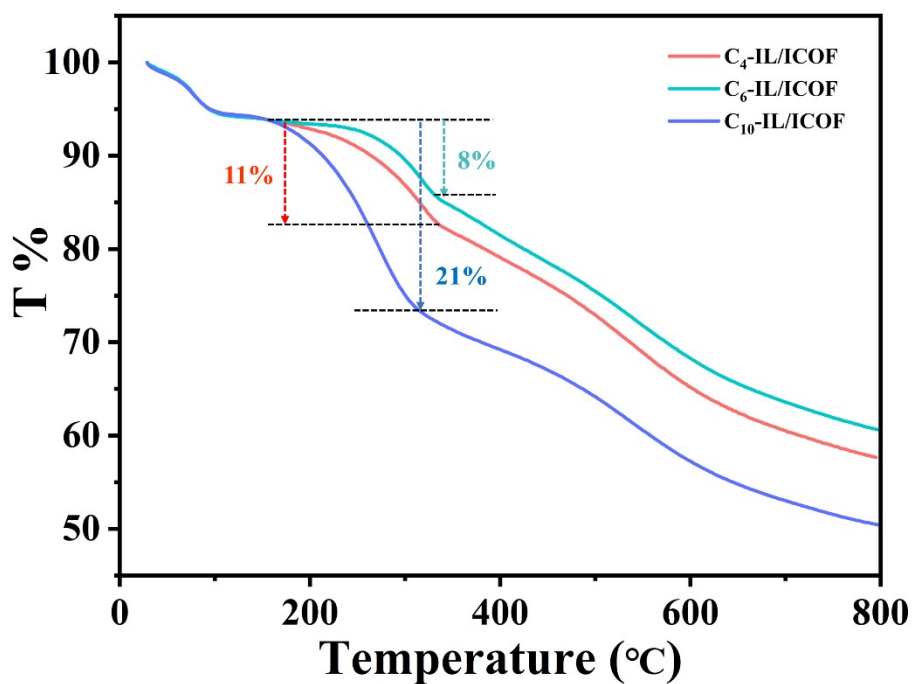

**Fig. 4** TGA of C<sub>4</sub>-IL/ICOF, C<sub>6</sub>-IL/ICOF and C<sub>10</sub>-IL/ICOF.

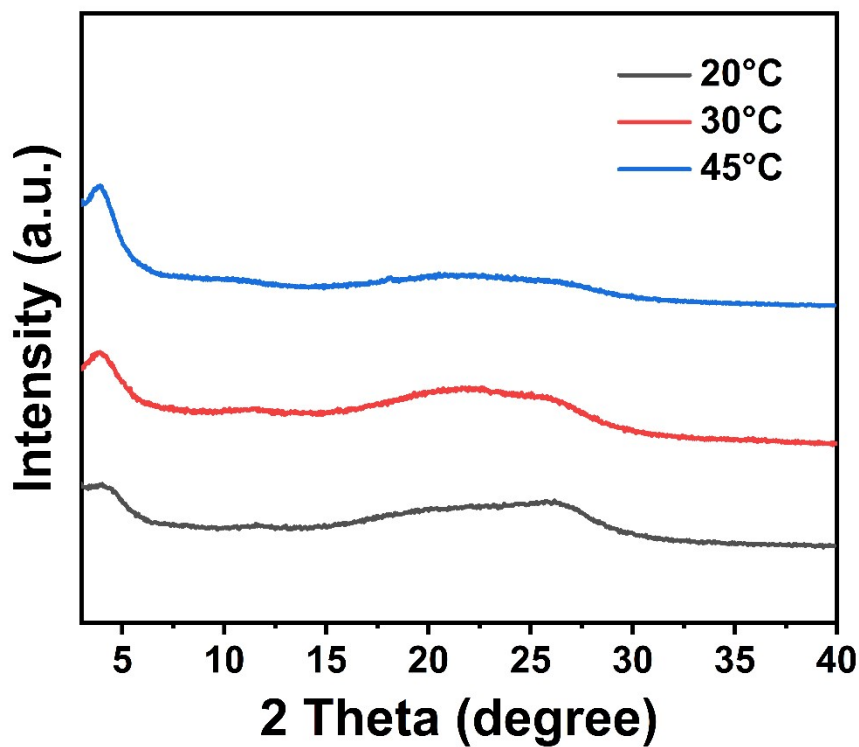

Fig. 5 PXRD patterns of  $C_4$ -IL/ICOF synthesized at 20, 30 and 45°C, respectively.

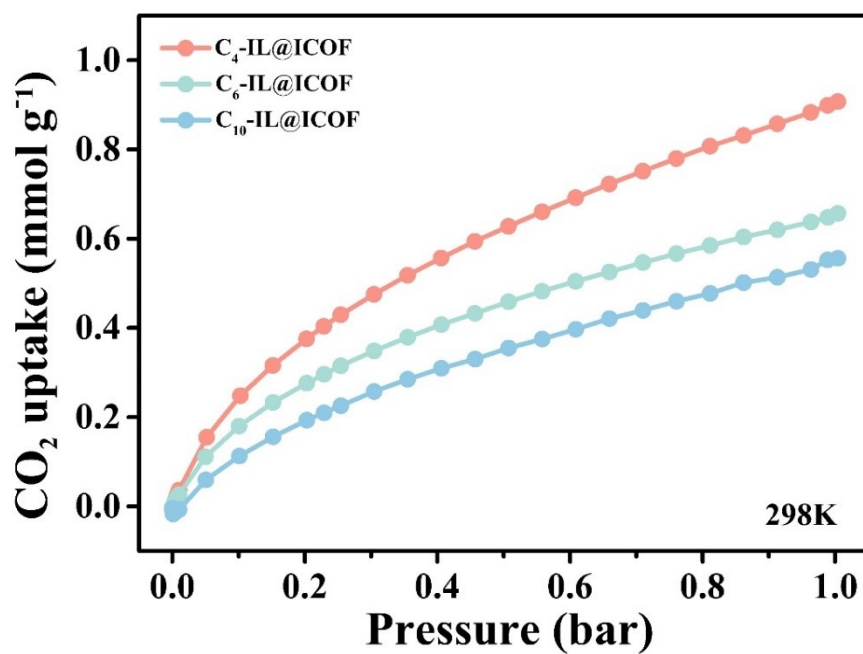

Fig. 6  $CO_2$  adsorption isotherms of  $C_n$ -IL/ICOF at 298 K ( $n = 4, 6, 10$ , respectively).

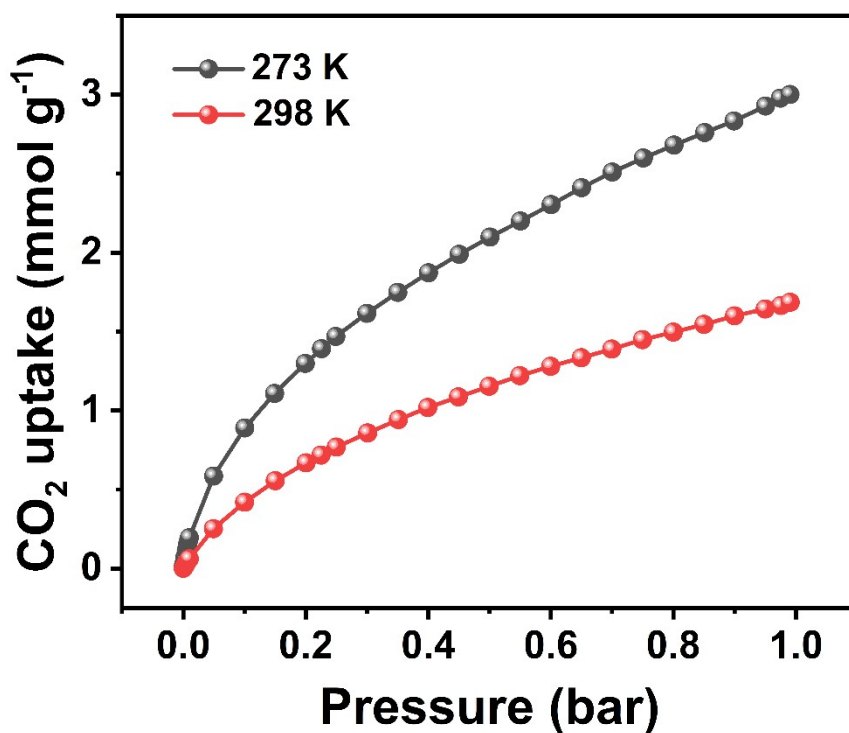

Fig. 7 CO<sub>2</sub> adsorption isotherms of EB-COF at 273 and 298 K.

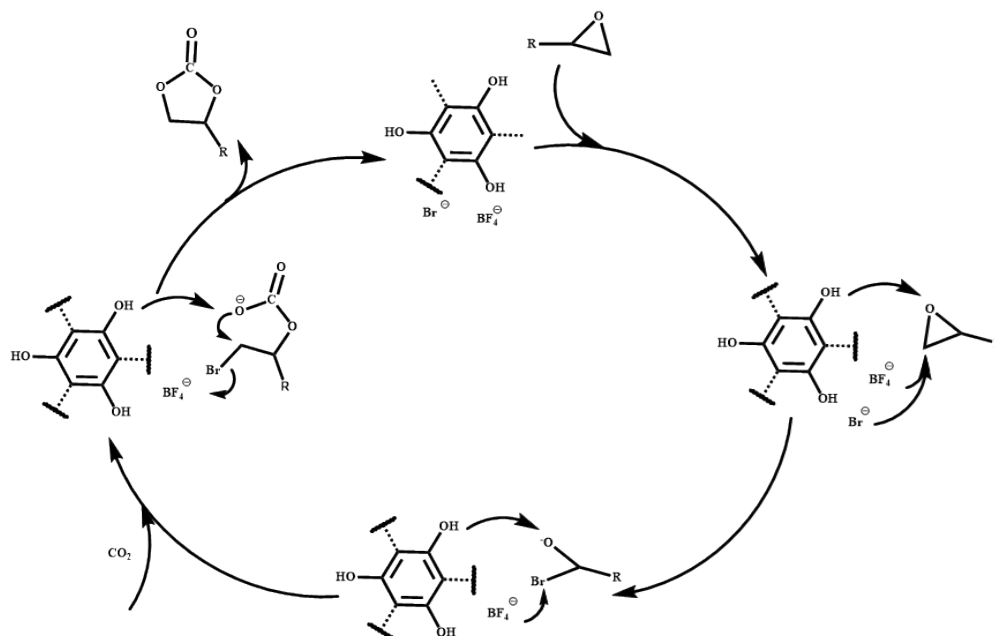

Fig. 8 A possible mechanism of cycloaddition of CO<sub>2</sub> with oxide over C<sub>4</sub>-IL/ICOF.

**Table 1** CO<sub>2</sub> adsorption performance of some typical materials at 273 and 298 K

| Materials                | S <sub>BET</sub><br>(m <sup>2</sup> /g) | CO <sub>2</sub> uptake |       | Ref.      |
|--------------------------|-----------------------------------------|------------------------|-------|-----------|
|                          |                                         | (mmol/g)               |       |           |
|                          |                                         | 273 K                  | 298 K |           |
| ZIF-8                    | 1769                                    | 1.47                   | -     | S1        |
| POP-PBnCl-TPPMg-4        | 411                                     | 1.25                   | 0.84  | S2        |
| POP-PA-COOH              | 754                                     | 1.89                   | 1.09  | S3        |
| FJC-1                    | 1726                                    | 2.86                   | 1.84  | S4        |
| PAF-1                    | 5640                                    | 2.07                   | -     | S5        |
| C <sub>4</sub> -IL/ICOF  | 53                                      | 1.63                   | 0.91  | This work |
| C <sub>6</sub> -IL/ICOF  | 103                                     | 1.41                   | 0.66  | This work |
| C <sub>10</sub> -IL/ICOF | 113                                     | 0.86                   | 0.56  | This work |



**Table 2** Cycloaddition of epoxides with CO<sub>2</sub> using C<sub>n</sub>-IL/ICOF and the corresponding amorphous POP as catalysts

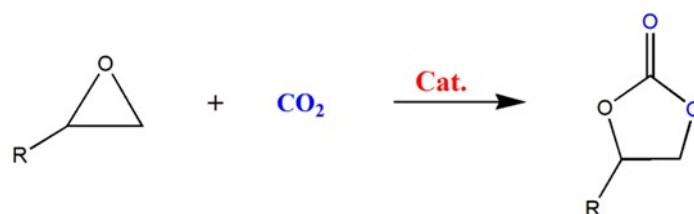

| Entry | Epoxides | Product | Catalyst                 | Yield (%)   |
|-------|----------|---------|--------------------------|-------------|
| 1     |          |         | C <sub>4</sub> -IL@ICOF  | <b>14.0</b> |
|       |          |         | C <sub>6</sub> -IL@ICOF  | <b>10.1</b> |
|       |          |         | C <sub>10</sub> -IL@ICOF | <b>11.5</b> |
| 2     |          |         | C <sub>4</sub> -IL@ICOF  | <b>93.8</b> |
|       |          |         | C <sub>6</sub> -IL@ICOF  | <b>92.6</b> |
|       |          |         | C <sub>10</sub> -IL@ICOF | <b>95.4</b> |
|       |          |         | POP                      | <b>49.8</b> |
| 3     |          |         | C <sub>4</sub> -IL@ICOF  | <b>99.8</b> |
|       |          |         | C <sub>6</sub> -IL@ICOF  | <b>99.8</b> |
|       |          |         | C <sub>10</sub> -IL@ICOF | <b>99.8</b> |

Reaction conditions: CO<sub>2</sub> pressure (1.8 MPa), reaction time (7 h), temperature (130°C)

## Reference

- [1] W.L. Xiang, C.Y. Shen, Z. Lu, S. Chen, X. Li, R. Zou, Y.P. Zhang and C.J. Liu, *Chem. Eng. Sci.*, 2021, **233**, 116429.
- [2] Z.F. Dai, Y.Q. Tang, F. Zhang, Y.B. Xiong, S. Wang, Q. Sun, L. Wang, X.J. Meng, L.H. Zhao, and F.S. Xiao, *Chin. J. Catal.*, 2021, **42**, 618-626.
- [3] Z.F. Dai, Y.F. Bao, J.D. Yuan, J.Z. Yao and Y.B. Xiong, *Chem Commun*, 2021, **57**, 9732-9735.
- [4] M. R. Liebl and J. Senker, *Chem. Mater*, 2013, **25**, 970-980.
- [5] M. G. Rabbani and H.M. El-Kaderi, *Chem. Mater.*, 2011, **23**, 1650-1653.
